# Supplementary material for: Risk of recurrent spontaneous preterm birth among those with persistent cervical HPV infection
Source: Research Square preprint supplement (doi:10.21203/rs.3.rs-9861232/v1), 2026-06-02
Supplement: Supplementary file 1 [file 7e74621a89ecd909711c9881.docx]

**Supplemental information**

**Supplemental Table 1.** Subgroup Analysis for Independence of Obstetrical Outcomes and LEEP/Cone and HPV Vaccination Status. a denotes chi-square test. b denotes Fisher test.

|  | **2nd Pregnancy** | |  | |
| --- | --- | --- | --- | --- |
|  | **cHPV+ (N = 27)** | **cHPV- (N = 63)** | **Total (N=90)** | **P-value** |
| **PPROM and LEEP/Cone Prior, N (%)** |  |  |  | 1.0000b |
| No | 27 (100.0%) | 62 (98.4%) | 89 (98.9%) |  |
| Yes | 0 (0.0%) | 1 (1.6%) | 1 (1.1%) |  |
| **PPROM and No LEEP/Cone Prior, N (%)** |  |  |  | 0.6341b |
| No | 25 (92.6%) | 60 (95.2%) | 85 (94.4%) |  |
| Yes | 2 (7.4%) | 3 (4.8%) | 5 (5.6%) |  |
| **PPROM and HPV Vaccination Start, N (%)** |  |  |  |  |
| No | 27 (100.0%) | 63 (100.0%) | 90 (100.0%) |  |
| **PPROM and No HPV Vaccination Start, N (%)** |  |  |  | 1.0000b |
| No | 25 (92.6%) | 59 (93.7%) | 84 (93.3%) |  |
| Yes | 2 (7.4%) | 4 (6.3%) | 6 (6.7%) |  |
| **PTB and LEEP/Cone Prior, N (%)** |  |  |  | 0.6923b |
| No | 24 (88.9%) | 58 (92.1%) | 82 (91.1%) |  |
| Yes | 3 (11.1%) | 5 (7.9%) | 8 (8.9%) |  |
| **PTB and HPV Vaccination Start, N (%)** |  |  |  | 0.3000b |
| No | 26 (96.3%) | 63 (100.0%) | 89 (98.9%) |  |
| Yes | 1 (3.7%) | 0 (0.0%) | 1 (1.1%) |  |
| **PTB and No HPV Vaccination Start, N (%)** |  |  |  | 0.3552a |
| No | 19 (70.4%) | 50 (79.4%) | 69 (76.7%) |  |
| Yes | 8 (29.6%) | 13 (20.6%) | 21 (23.3%) |  |

**Supplemental Table 2.** Placental Pathology for Each Pregnancy. adenotes chi-square test. bdenotes Fisher test. †denotes more than one checkbox could be checked.

|  | **Index pregnancy** | **2nd Pregnancy (cHPV+)** | **2nd Pregnancy (cHPV-)** | **P-value** | **3rd Pregnancy (cHPV+)** | **3rd Pregnancy (cHPV-)** | **P-value** |
| --- | --- | --- | --- | --- | --- | --- | --- |
| **(N=191)** | **(N=27)** | **(N=63)** |  | **(N=11)** | **(N=19)** |  |
| **Evidence of placental abruption, N (%)** |  |  |  | 0.6929a |  |  | 0.6562a |
| No | 156 (94.5%) | 13 (100.0%) | 33 (97.1%) |  | 4 (100.0%) | 7 (87.5%) |  |
| Yes | 9 (5.5%) | 0 (0.0%) | 1 (2.9%) |  | 0 (0.0%) | 1 (12.5%) |  |
| Missing | 26 | 14 | 29 |  | 7 | 11 |  |
| **Disrupted and incomplete maternal surface, N (%)** |  |  |  | 0.6929a |  |  | N/A |
| No | 151 (92.1%) | 11 (84.6%) | 31 (91.2%) |  | 4 (100.0%) | 7 (100.0%) |  |
| Yes | 13 (7.9%) | 2 (15.4%) | 3 (8.8%) |  | 0 (0.0%) | 0 (0.0%) |  |
| Missing | 27 | 14 | 29 |  | 7 | 12 |  |
| **Placenta weight percentile, N (%)** |  |  |  | 0.4469a |  |  | 0.6425a |
| 10 | 2 (4.0%) | 1 (25.0%) | 0 (0.0%) |  | 0 (0.0%) | 0 (0.0%) |  |
| <10 | 24 (48.0%) | 2 (50.0%) | 8 (88.9%) |  | 1 (100.0%) | 1 (50.0%) |  |
| <25 | 2 (4.0%) | 0 (0.0%) | 0 (0.0%) |  | 0 (0.0%) | 0 (0.0%) |  |
| >75 | 1 (2.0%) | 0 (0.0%) | 0 (0.0%) |  | 0 (0.0%) | 0 (0.0%) |  |
| >90 | 20 (40.0%) | 1 (25.0%) | 1 (11.1%) |  | 0 (0.0%) | 1 (50.0%) |  |
| Missing | 141 | 23 | 54 |  | 10 | 17 |  |
| **Presence of inflammation (chorioamnionitis, villitis, funisitis), N (%)b,†** |  |  |  | 0.4808a |  |  | 1.0000a |
| Chorioamnionitis | 31 (19.1%) | 2 (15.4%) | 1 (2.9%) |  | 1 (25.0%) | 0 (0.0%) |  |
| Acute villitis | 4 (2.5%) | 0 (0.0%) | 0 (0.0%) |  | 0 (0.0%) | 0 (0.0%) |  |
| Chronic villitis | 7 (4.3%) | 3 (23.1%) | 4 (11.8%) |  | 0 (0.0%) | 0 (0.0%) |  |
| Funisitis | 6 (3.7%) | 0 (0.0%) | 0 (0.0%) |  | 0 (0.0%) | 0 (0.0%) |  |
| None | 123 (75.9%) | 8 (61.5%) | 30 (88.2%) |  | 3 (75.0%) | 7 (100%) |  |
| Missing | 29 | 14 | 29 |  | 7 | 12 |  |
